# Supplementary material for: ReSe2 nanotubes synthesized from sacrificial templates
Source: Royal Society of Chemistry journal article supplement (doi:10.1039/b809187k), 2009-01-01
Supplement: b809187k.pdf [file b809187k.pdf]

## **ReSe<sub>2</sub> Nanotubes Synthesized From Sacrificial Templates**

David B. Seley, Manashi Nath, and B. A. Parkinson\*  
Department of Chemistry  
Colorado State University  
Fort Collins, CO 80523.

### **Supporting Information**

#### **Experimental Methods**

##### *Se nanotubes:*

The Se nanotubes were made by a procedure similar to a reported one.<sup>S1</sup> In a typical experiment, 40 mg (0.5 mmoles) of elemental Se was dissolved in 20 ml of ethylenediamine by magnetic stirring for several hours until complete dissolution occurs. The yellow-amber solution was then added dropwise to 15 ml of deionized water, which was being ultrasonically treated. The appearance of amorphous selenium was immediately apparent as the ethylene diamine/Se/H<sub>2</sub>O mixture became reddish. This solution was ultrasonically treated for about 1 hour or until a metallic looking film appeared on the surface of the solution. The solution was then removed from the ultrasonic bath and allowed to sit overnight in the dark. A dark solid film-like material fell to the bottom of the vial. The supernatant solution was removed carefully and the film-like material was washed with ethanol and air-dried. Large quantities of Se nanotubes were observed in the 25 mg (0.3 mmoles) dark film-like product.

##### *ReSe<sub>2</sub> nanotubes by solvothermal method:*

40 mg of  $\text{NH}_4\text{ReO}_4$  (0.15 mmoles) was dissolved in 10 ml of absolute ethanol with sonication and the solution was transferred to a Teflon lined acid digestion bomb. Se nanotubes were then added to this solution and stirred for several minutes. The autoclave was then sealed and placed in an oven at 135 °C for a period of 6 days. Upon removal from the oven, the autoclave was allowed to cool down to ambient conditions. A black precipitate was isolated from the product by centrifugation and was washed several times with water and ethanol. Pxd and SEM of the black precipitate revealed that it contained the  $\text{ReSe}_2$  nanotubes. Small amount of the precipitate was dispersed in ethanol and added on formvar coated holey Cu grids for TEM studies.

Reference S1: Chen, Y-T.; Zhang, W.; Zhang, F-B.; Zhang, Z-X.; Zhou, B-J.; Li, H-L. *Mater. Lett.* **2004**, *58*, 2761.

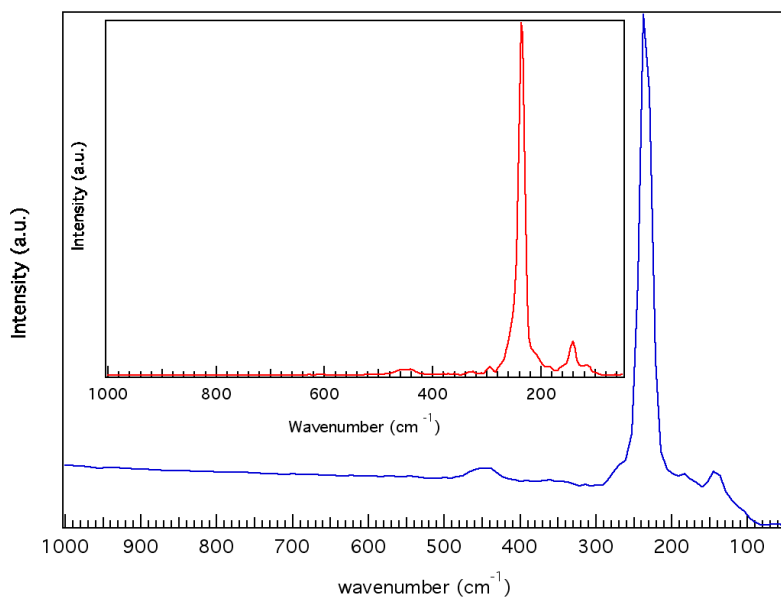

**Fig. S1.** Raman spectra of Se nanotubes showing the typical Raman shifts characteristic of Se. Inset shows the Raman spectra obtained from pure, bulk Se.

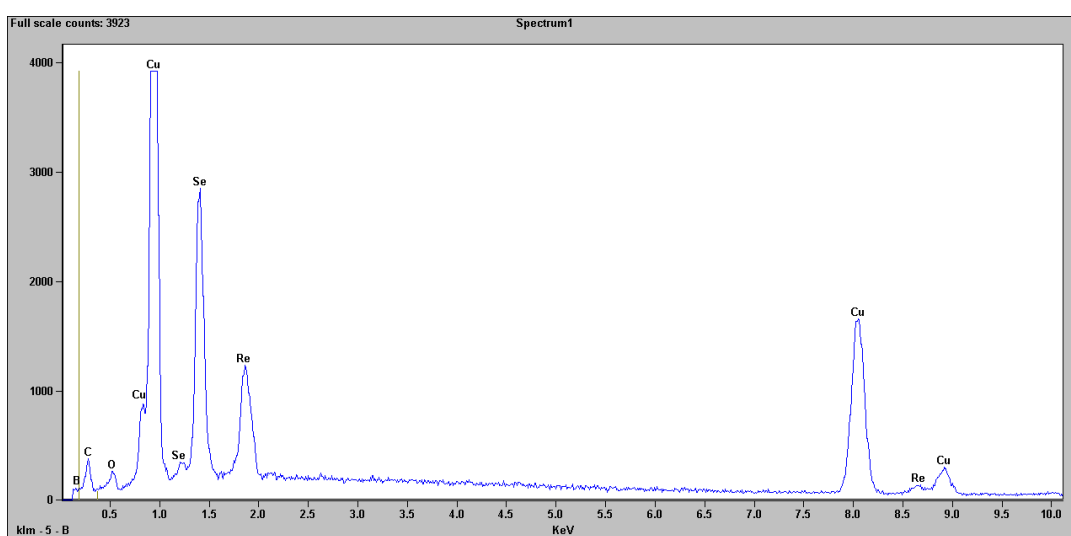

**Fig. S2.** EDX analysis of ReSe<sub>2</sub> furry nanotubes. The Re:Se atomic ratio is estimated to be approximately 1:2. The standard deviations were 3.84% for Se and 4.25% for Re. The EDX was collected at 15kV.

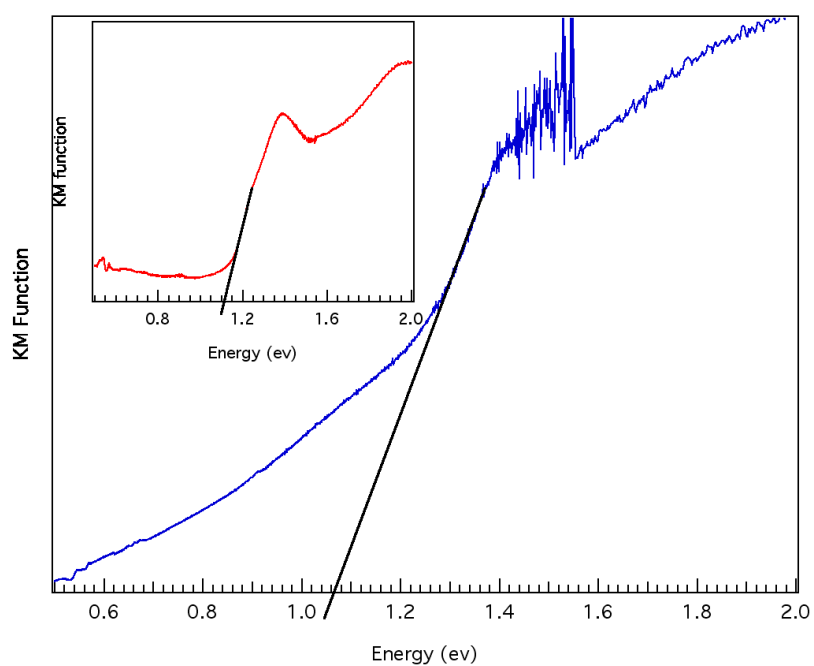

**Fig. S3.** DRS spectra of ReSe<sub>2</sub> furry nanotubes. The bandgap is estimated to be ~1.07 eV. Inset shows the DRS spectra obtained from crystalline flakes of bulk ReSe<sub>2</sub>, where the bandgap is estimated to be ~1.1 eV.

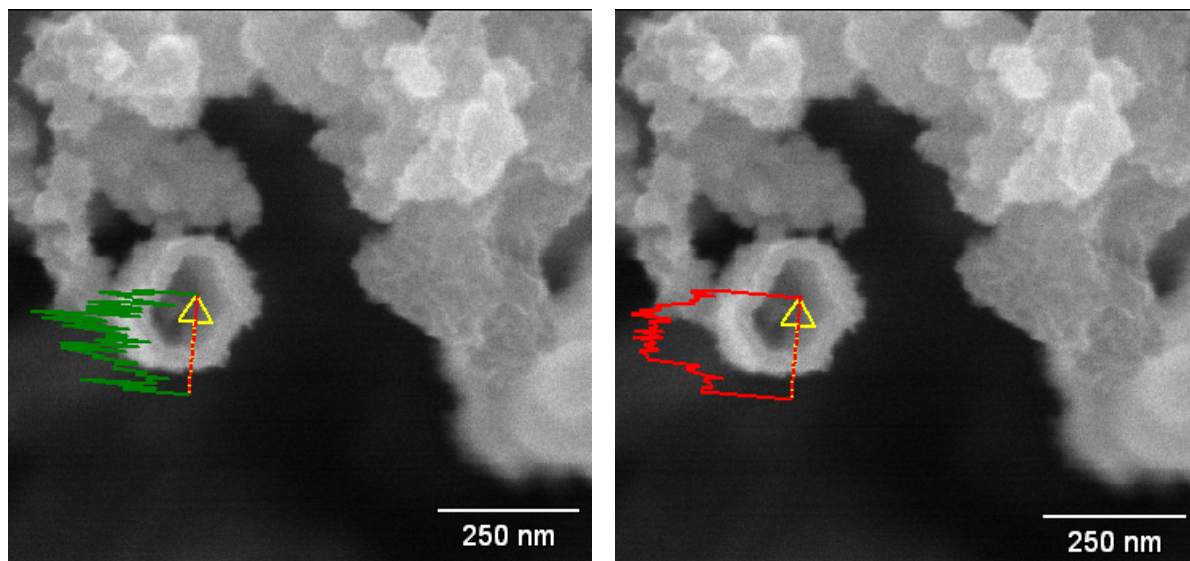

**Fig. S4.** Elemental mapping of Re and Se across the wall of an open nanotube. Re (green ) and Se(red) essentially follow each other indicating that the elemental composition across the nanotube wall is homogeneous..

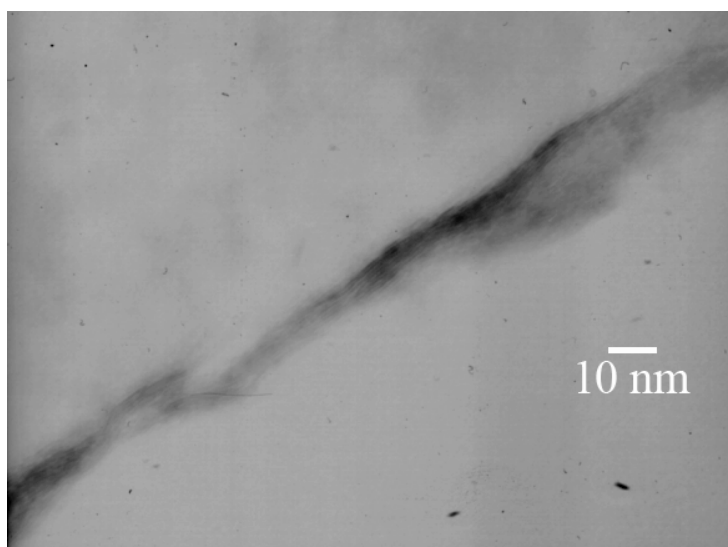

**Fig. S5.** High-magnification TEM image of a nanotube wall after annealing. The lattice fringes give a spacing of 5.5 Å.
